# Supplementary material for: Computational Aspects of N-Mixture Models
Source: PubMed Central journal article supplement (PMC4406156; doi:10.1111/biom.12246), 2014-10-14
Supplement: biom0071-0237-sd1.pdf [file biom0071-0237-sd1.pdf]

1 Web-based Supplementary Materials for

2 *Computational aspects of N-mixture models*

3 by Emily B. Dennis, Byron J.T. Morgan & Martin S. Ridout

4 **Web Appendix 1**

5 **The effect of the choice of  $K$  on fitting the N-mixture model**

6 Section 5 of the paper demonstrates that the infinite values of  $\hat{\lambda}$  shown in Section 3.2 for  
7 the bivariate Poisson are limited by the value of  $K$  adopted in the corresponding Poisson  
8 N-mixture model. Here this effect of  $K$  is discussed further.

9 Web Figure 1a illustrates the effect of  $K$  for a single simulated dataset, with  $\hat{\lambda}$  increasing  
10 linearly with  $K$ . The corresponding relationships from different simulations and parameter  
11 values are found to be very similar. The heuristic reason for this, and the fact that the  
12 green line in Web Figure 1a lies below the line of unit slope through the origin, is that in  
13 the mixture in (1), for large  $\lambda$  the Poisson distribution is approximately Normal,  $N(\lambda, \lambda)$ .  
14 For values of  $K$  in the approximate range  $\lambda \pm 2\sqrt{\lambda}$ , the effect of  $K$  is to lose a large fraction  
15 of this probability, and hence reduce the likelihood. Therefore it would not be possible to  
16 estimate  $\lambda$  values that correspond to reduced values of the likelihood and thus in practice  
17  $K > \hat{\lambda}$ .

18 For a negative-binomial mixing distribution, we find that where  $\hat{\lambda}$  is infinite for the Pois-  
19 son distribution, the green solid line in Web Figure 1a is unchanged for the negative binomial.  
20 However, for a different simulation (blue lines), when the sample covariance diagnostic (5) is  
21 positive, for a Poisson mixing distribution,  $\hat{\lambda} = 6.64$  for increasing  $K$ , but using the negative  
22 binomial  $\hat{\lambda}$  increases with  $K$  but with a smaller slope than that of the Poisson line. Hence the  
23 single covariance diagnostic is not sufficient for the negative-binomial distribution, which can

24 produce large estimates that increase with  $K$  in cases where the diagnostic is positive and  
25  $\hat{\lambda}$  from the Poisson distribution is stable. We encounter this latter case again in Section 7.  
26 An additional diagnostic for the negative-binomial case is given in Section 6 and explored  
27 via simulation in Web Appendix 2.

28 Web Figure 1b shows that as the value of  $\hat{\lambda}$  increases, the smaller eigenvalue of the Hessian  
29 matrix of the log likelihood evaluated at the maximum-likelihood estimate, estimated within  
30 `optim`, decreases towards zero. The model becomes near singular (Catchpole et al., 2001),  
31 with only the product  $\lambda p$  being estimable, corresponding to the thinned Poisson situation.  
32 Estimates from  $K=200$  and  $K=1000$  are equivalent for finite  $\hat{\lambda}$  (and hence overlap in the  
33 main peak in Figure 2), but differ when  $\hat{\lambda}$  should be infinite and  $\hat{\lambda}$  approaches  $K$ . In  
34 particular, the spread of non-zero eigenvalues when  $\hat{\lambda}$  is close to  $K$  is reduced for larger  $K$   
35 (Web Figure 1b). The artificial truncation of the range of  $\lambda$  by  $K$  (demonstrated in Figure 2  
36 and Web Figure 5) is responsible for the non-zero values of the smaller eigenvalue for the  
37 largest values of  $\hat{\lambda}$  (Web Figure 1b).

38 The sampling distribution of the product  $\widehat{\lambda p}$  is unbiased (Web Figure 2), hence when  
39 finite estimation of  $\hat{\lambda}$  is impossible, only a single thinned-Poisson parameter  $\lambda p$  is estimable,  
40 the hyperbola for which is shown in Web Figure 3a. Web Figure 3b illustrates the log-log  
41 transform of Web Figure 3a, rotated  $135^\circ$  about the axis to examine possible differences for  
42 an increasing number of visits,  $T$ . The main distribution shows similar spread for different  
43 values of  $T$  but fewer small estimates of  $\lambda$  as more visits are made. For cases where  $\hat{\lambda}$  is  
44 truncated by  $K$ , estimates of  $\lambda$  do not vary with  $T$ , as found also when the green line of Web  
45 Figure 1a did not vary for alternative parameter values. However corresponding estimates of  
46  $p$  (not given here) show less variation for greater  $T$ , corresponding to the greater information  
47 available for more visits.

## 48 **References**

- 49 Catchpole, E. A., Kgosi, P. M., and Morgan, B. J. T. (2001). On the near-singularity of  
50 models for animal recovery data. *Biometrics* **57**, 720–726.

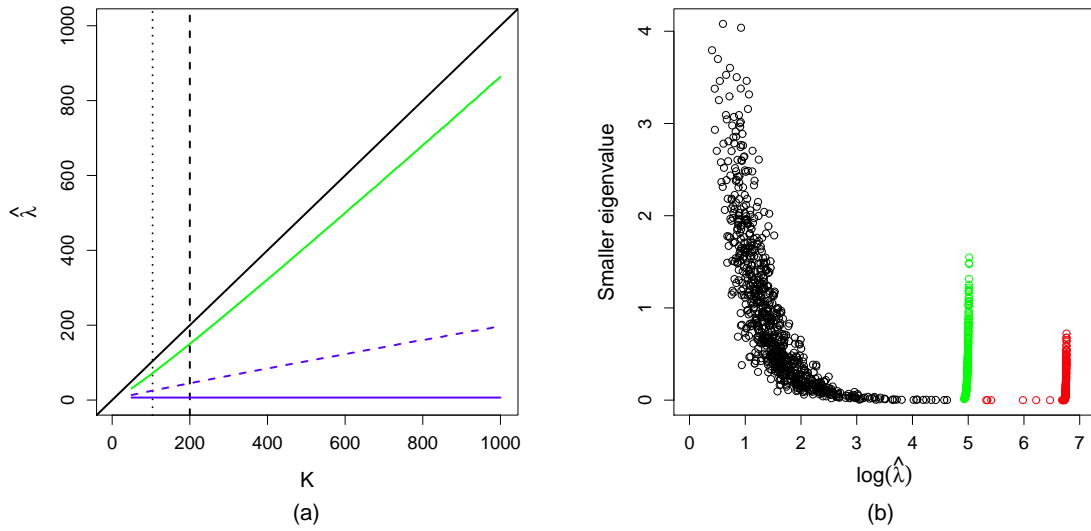

Web Figure 1: a)  $\hat{\lambda}$  plotted against increasing  $K$  for a single simulation (green) with default values of  $K$  for `unmarked` ( $K = \max(\text{count}) + 100$ , dotted) and `PRESENCE` ( $K = 200$ , dashed) also shown.  $\hat{\lambda}$  is plotted against increasing  $K$  for a different simulation in blue, with a comparison of  $\lambda$  estimates for a Poisson (solid) and negative-binomial (dashed) mixing distribution. b) A plot of  $\log(\hat{\lambda})$  versus the smaller eigenvalue of the estimated Hessian at the maximum-likelihood estimate for  $K = 200$  &  $1000$  (black),  $K = 200$  (green) and  $K = 1000$  (red) based upon 1000 simulated datasets. The parameter values used were  $T = 2$ ,  $R = 20$ ,  $\lambda = 5$  and  $p = 0.25$ .

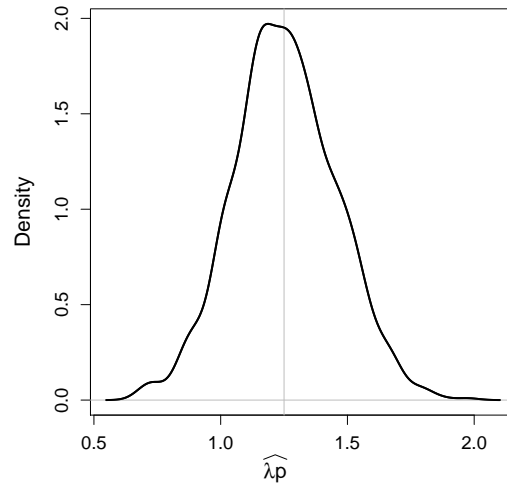

Web Figure 2: Kernel density estimate for  $\widehat{\lambda}_p$  from the Poisson N-mixture model, based upon 1000 simulated datasets for  $K = 200$ ,  $T = 2$  and  $R = 20$ ,  $\lambda = 5$  and  $p = 0.25$ .

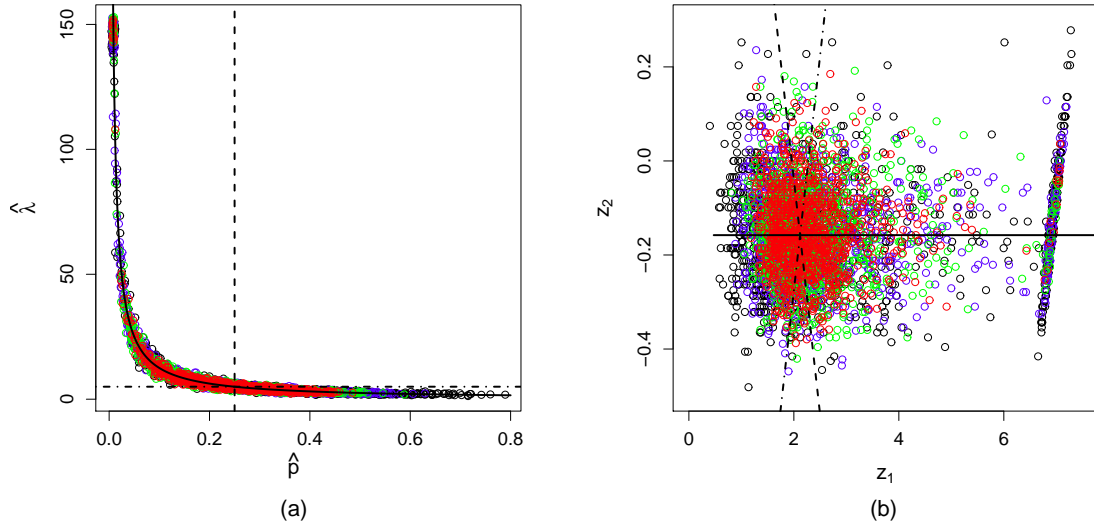

Web Figure 3: (a) A plot of  $\hat{\lambda}$  versus  $\hat{p}$  and (b)  $\log(\hat{\lambda})$  versus  $\log(\hat{p})$  rotated  $135^\circ$  clockwise about the origin, for  $T = 2$  (black),  $T = 3$  (blue),  $T = 4$  (green) and  $T = 5$  (red) based upon 1000 simulated datasets for  $K = 200$ ,  $R = 20$ ,  $\lambda = 5$  and  $p = 0.25$ .  $z_1 = -\frac{1}{\sqrt{2}}\log\hat{p} + \frac{1}{\sqrt{2}}\log\hat{\lambda}$  and  $z_2 = -\frac{1}{\sqrt{2}}\log\hat{p} - \frac{1}{\sqrt{2}}\log\hat{\lambda}$ . In a) the solid line represents the hyperbola for  $\lambda p$  and the straight lines correspond to the known values of  $p$  (dashed) and  $\lambda$  (dot-dash). In b) the straight lines represent the rotated logarithms of  $\lambda p$  (solid),  $p$  (dashed) and  $\lambda$  (dot-dash).

## 51 **Web Appendix 2**

### 52 **Performance of the method-of-moments estimation**

53 We assess the performance of MOM estimation as a simple method for parameter estimation  
54 compared to maximum likelihood estimation (MLE) from the N-mixture model. For the  
55 Poisson case, estimates for where the covariance diagnostic is negative were excluded in this  
56 comparison. Correspondingly, estimates for the negative-binomial were excluded when one  
57 or more of the diagnostics was negative. Additionally, for both the Poisson and negative-  
58 binomial, cases where either the MLE or MOM estimate of  $\lambda$  is finite but large ( $\hat{\lambda} > 100$ )  
59 were excluded to provide a fair comparison.

60 For the Poisson case, when  $p = 0.25$ , the MOM approach only performs better than  
61 MLE based upon RMSE when  $T = 2$  (Web Table 1). However for smaller  $p = 0.10$ , MOM  
62 estimation performs better for almost all cases (Web Table 2). In the negative-binomial case,  
63 results are not greatly affected by varying  $\alpha$  (Web Tables 3-6). As in the Poisson case, when  
64  $p = 0.25$ , MOM only outperforms MLE when few visits are made, which is emphasised when  
65  $\lambda$  is small. For smaller  $p = 0.10$ , MOM often performed better than MLE in terms of RMSE,  
66 although the difference was reduced for increasing  $T$  and  $\lambda$ .

67 Method of moments can quickly provide good estimates of  $\lambda$  and  $p$ , but it does not  
68 consistently outperform MLE. We suggest using MOM estimates as sensible starting values  
69 for optimisation of the N-mixture likelihood.

Web Table 1: Comparison of estimation via method-of-moments (MOM) and the N-mixture model (MLE) for the Poisson case with  $\lambda = 2, 5, 10$ ,  $p = 0.25$  and  $R = 20$  for 1000 simulations. RMSE is the root mean-squared error for  $\lambda$ . The upper bound  $K$  for the MLE was automatically selected such that the tail proportion was  $10^{-10}$ . EPD is the proportion of simulations discarded when the covariance diagnostic was negative or either estimate of  $\hat{\lambda} > 100$ . EPN is the proportion of simulations when both diagnostics were negative.

|                  | $T$ | Method | Mean | Median | RMSE  | EPD   | EPN   |
|------------------|-----|--------|------|--------|-------|-------|-------|
| a) $\lambda = 2$ | 2   | MLE    | 2.28 | 1.58   | 2.49  | 0.312 | 0.219 |
|                  |     | MOM    | 1.9  | 1.41   | 1.5   |       |       |
|                  | 3   | MLE    | 2.53 | 1.89   | 2.66  | 0.18  | 0.098 |
|                  |     | MOM    | 2.43 | 1.63   | 2.61  |       |       |
|                  | 4   | MLE    | 2.73 | 2.01   | 3.19  | 0.091 | 0.033 |
|                  |     | MOM    | 2.97 | 1.82   | 4.03  |       |       |
| 5                | MLE | 2.7    | 2.04 | 3.11   | 0.055 | 0.012 |       |
|                  | MOM | 2.93   | 1.93 | 4.37   |       |       |       |

|                  | $T$ | Method | Mean | Median | RMSE  | EPD   | EPN   |
|------------------|-----|--------|------|--------|-------|-------|-------|
| b) $\lambda = 5$ | 2   | MLE    | 5.97 | 3.87   | 7.92  | 0.258 | 0.171 |
|                  |     | MOM    | 5.45 | 3.64   | 5.72  |       |       |
|                  | 3   | MLE    | 6.95 | 4.74   | 7.97  | 0.152 | 0.083 |
|                  |     | MOM    | 6.68 | 4.27   | 9.01  |       |       |
|                  | 4   | MLE    | 6.44 | 4.93   | 6.74  | 0.081 | 0.017 |
|                  |     | MOM    | 6.97 | 4.57   | 8.29  |       |       |
| 5                | MLE | 6.47   | 5.04 | 6.03   | 0.046 | 0.008 |       |
|                  | MOM | 6.59   | 4.8  | 6.63   |       |       |       |

|                   | $T$ | Method | Mean  | Median | RMSE  | EPD   | EPN   |
|-------------------|-----|--------|-------|--------|-------|-------|-------|
| c) $\lambda = 10$ | 2   | MLE    | 11.5  | 8.07   | 11.52 | 0.255 | 0.157 |
|                   |     | MOM    | 9.96  | 7.21   | 8.79  |       |       |
|                   | 3   | MLE    | 12.89 | 9.51   | 11.72 | 0.147 | 0.072 |
|                   |     | MOM    | 12.39 | 8.76   | 11.82 |       |       |
|                   | 4   | MLE    | 12.89 | 9.87   | 10.72 | 0.094 | 0.029 |
|                   |     | MOM    | 12.78 | 9.34   | 11.44 |       |       |
| 5                 | MLE | 12.14  | 10.08 | 7.82   | 0.055 | 0.016 |       |
|                   | MOM | 12.42  | 9.53  | 9.87   |       |       |       |



Web Table 2: Comparison of estimation via method-of-moments (MOM) and the N-mixture model (MLE) for the Poisson case with  $\lambda = 2, 5, 10$ ,  $p = 0.1$  and  $R = 20$  for 1000 simulations. RMSE is the root mean-squared error for  $\lambda$ . The upper bound  $K$  for the MLE was automatically selected such that the tail proportion was  $10^{-10}$ . EPD is the proportion of simulations discarded when the covariance diagnostic was negative or either estimate of  $\hat{\lambda} > 100$ . EPN is the proportion of simulations when both diagnostics were negative.

|                  | $T$ | Method | Mean | Median | RMSE  | EPD   | EPN   |
|------------------|-----|--------|------|--------|-------|-------|-------|
| a) $\lambda = 2$ | 2   | MLE    | 1.1  | 0.77   | 1.51  | 0.61  | 0.52  |
|                  |     | MOM    | 0.71 | 0.61   | 1.36  |       |       |
|                  | 3   | MLE    | 1.87 | 1.12   | 2.41  | 0.506 | 0.377 |
|                  |     | MOM    | 1.25 | 0.94   | 1.22  |       |       |
|                  | 4   | MLE    | 2.43 | 1.4    | 3.4   | 0.444 | 0.283 |
|                  |     | MOM    | 1.58 | 0.98   | 1.51  |       |       |
| 5                | MLE | 2.65   | 1.58 | 3.97   | 0.356 | 0.214 |       |
|                  | MOM | 1.94   | 1.21 | 2.27   |       |       |       |

|                  | $T$ | Method | Mean | Median | RMSE  | EPD   | EPN   |
|------------------|-----|--------|------|--------|-------|-------|-------|
| b) $\lambda = 5$ | 2   | MLE    | 3.19 | 1.97   | 5.62  | 0.52  | 0.424 |
|                  |     | MOM    | 2.25 | 1.67   | 3.31  |       |       |
|                  | 3   | MLE    | 4.6  | 2.84   | 5.79  | 0.467 | 0.331 |
|                  |     | MOM    | 3.53 | 2.18   | 4.09  |       |       |
|                  | 4   | MLE    | 6.33 | 3.63   | 9.04  | 0.387 | 0.235 |
|                  |     | MOM    | 5.42 | 2.7    | 7.45  |       |       |
| 5                | MLE | 6.71   | 4.08 | 8.64   | 0.364 | 0.203 |       |
|                  | MOM | 5.39   | 3.09 | 7.92   |       |       |       |

|                   | $T$ | Method | Mean  | Median | RMSE  | EPD   | EPN   |
|-------------------|-----|--------|-------|--------|-------|-------|-------|
| c) $\lambda = 10$ | 2   | MLE    | 6.72  | 4.01   | 8.8   | 0.527 | 0.451 |
|                   |     | MOM    | 4.73  | 3.17   | 6.82  |       |       |
|                   | 3   | MLE    | 10.16 | 6      | 12.5  | 0.433 | 0.299 |
|                   |     | MOM    | 8.21  | 4.55   | 11    |       |       |
|                   | 4   | MLE    | 12.5  | 7.96   | 13.99 | 0.387 | 0.223 |
|                   |     | MOM    | 9.72  | 5.85   | 11.73 |       |       |
| 5                 | MLE | 11.59  | 7.69  | 11.78  | 0.384 | 0.174 |       |
|                   | MOM | 10.53  | 6.76  | 12.59  |       |       |       |

Web Table 3: Comparison of estimation via method-of-moments (MOM) and the N-mixture model (MLE) for the negative-binomial case with  $\lambda = 2, 5, 10$ ,  $p = 0.25$ ,  $\alpha = 1.25$ , and  $R = 20$  for 1000 simulations. RMSE is the root mean-squared error for  $\lambda$ . The upper bound  $K$  for the MLE was automatically selected such that the tail proportion was  $10^{-10}$ . EPD is the proportion of simulations discarded when either covariance diagnostic was negative or either estimate of  $\hat{\lambda} > 100$ . EPN is the proportion of simulations when both diagnostics were negative.

|                  | $T$ | Method | Mean | Median | RMSE  | EPD   | EPN   |
|------------------|-----|--------|------|--------|-------|-------|-------|
| a) $\lambda = 2$ | 2   | MLE    | 2.24 | 1.44   | 4.22  | 0.256 | 0.058 |
|                  |     | MOM    | 1.81 | 1.3    | 1.67  |       |       |
|                  | 3   | MLE    | 2.52 | 1.72   | 3.52  | 0.185 | 0.013 |
|                  |     | MOM    | 2.49 | 1.57   | 3.33  |       |       |
|                  | 4   | MLE    | 2.64 | 1.78   | 3.6   | 0.129 | 0     |
|                  |     | MOM    | 2.84 | 1.71   | 5.37  |       |       |
| 5                | MLE | 2.7    | 1.84 | 4.1    | 0.093 | 0     |       |
|                  | MOM | 2.89   | 1.79 | 5.31   |       |       |       |

|                  | $T$ | Method | Mean | Median | RMSE | EPD   | EPN   |
|------------------|-----|--------|------|--------|------|-------|-------|
| b) $\lambda = 5$ | 2   | MLE    | 5.42 | 3.44   | 8.58 | 0.258 | 0.009 |
|                  |     | MOM    | 5.2  | 3.16   | 7.67 |       |       |
|                  | 3   | MLE    | 6.43 | 4.35   | 8.13 | 0.192 | 0     |
|                  |     | MOM    | 6.14 | 3.93   | 7.8  |       |       |
|                  | 4   | MLE    | 5.99 | 4.32   | 5.82 | 0.151 | 0     |
|                  |     | MOM    | 6.82 | 4.34   | 8.25 |       |       |
| 5                | MLE | 5.88   | 4.56 | 5.49   | 0.1  | 0     |       |
|                  | MOM | 6.63   | 4.52 | 7.56   |      |       |       |

|                   | $T$ | Method | Mean  | Median | RMSE  | EPD   | EPN   |
|-------------------|-----|--------|-------|--------|-------|-------|-------|
| c) $\lambda = 10$ | 2   | MLE    | 10.66 | 7.07   | 11.3  | 0.287 | 0.001 |
|                   |     | MOM    | 9.32  | 6.36   | 9.11  |       |       |
|                   | 3   | MLE    | 11.49 | 8.55   | 9.29  | 0.207 | 0     |
|                   |     | MOM    | 11.74 | 7.92   | 12.1  |       |       |
|                   | 4   | MLE    | 11.76 | 8.79   | 10.52 | 0.135 | 0     |
|                   |     | MOM    | 11.45 | 8.38   | 10.24 |       |       |
| 5                 | MLE | 11.68  | 9.12  | 9.08   | 0.106 | 0     |       |
|                   | MOM | 11.44  | 8.4   | 10.2   |       |       |       |

Web Table 4: Comparison of estimation via method-of-moments (MOM) and the N-mixture model (MLE) for the negative-binomial case with  $\lambda = 2, 5, 10$ ,  $p = 0.1$ ,  $\alpha = 1.25$ , and  $R = 20$  for 1000 simulations. RMSE is the root mean-squared error for  $\lambda$ . The upper bound  $K$  for the MLE was automatically selected such that the tail proportion was  $10^{-10}$ . EPD is the proportion of simulations discarded when either covariance diagnostic was negative or either estimate of  $\hat{\lambda} > 100$ . EPN is the proportion of simulations when both diagnostics were negative.

| $T$ | Method | Mean | Median | RMSE | EPD   | EPN   |
|-----|--------|------|--------|------|-------|-------|
| 2   | MLE    | 1.02 | 0.64   | 1.92 | 0.565 | 0.401 |
|     | MOM    | 0.67 | 0.51   | 1.4  |       |       |
| 3   | MLE    | 1.48 | 0.91   | 2.38 | 0.45  | 0.187 |
|     | MOM    | 1.1  | 0.8    | 1.35 |       |       |
| 4   | MLE    | 1.7  | 1.06   | 2.48 | 0.425 | 0.097 |
|     | MOM    | 1.36 | 0.9    | 1.55 |       |       |
| 5   | MLE    | 2.58 | 1.38   | 6.25 | 0.349 | 0.044 |
|     | MOM    | 1.7  | 1.08   | 1.92 |       |       |

| $T$ | Method | Mean | Median | RMSE | EPD   | EPN   |
|-----|--------|------|--------|------|-------|-------|
| 2   | MLE    | 2.69 | 1.68   | 5.13 | 0.455 | 0.161 |
|     | MOM    | 1.96 | 1.41   | 3.51 |       |       |
| 3   | MLE    | 3.74 | 2.29   | 5.51 | 0.405 | 0.048 |
|     | MOM    | 3.32 | 2      | 4.51 |       |       |
| 4   | MLE    | 5.19 | 2.73   | 8.69 | 0.364 | 0.012 |
|     | MOM    | 4.47 | 2.36   | 6.91 |       |       |
| 5   | MLE    | 5.46 | 2.95   | 8.93 | 0.348 | 0.002 |
|     | MOM    | 4.53 | 2.67   | 7.88 |       |       |

| $T$ | Method | Mean | Median | RMSE  | EPD   | EPN   |
|-----|--------|------|--------|-------|-------|-------|
| 2   | MLE    | 5.79 | 3.36   | 9.68  | 0.439 | 0.037 |
|     | MOM    | 4.28 | 2.89   | 7.02  |       |       |
| 3   | MLE    | 7.63 | 4.24   | 11.08 | 0.373 | 0.002 |
|     | MOM    | 6.13 | 3.94   | 7.75  |       |       |
| 4   | MLE    | 8.84 | 5.47   | 10.57 | 0.373 | 0     |
|     | MOM    | 8.64 | 5.1    | 11.67 |       |       |
| 5   | MLE    | 8.73 | 5.7    | 10.27 | 0.35  | 0     |
|     | MOM    | 8.3  | 5.14   | 9.72  |       |       |

Web Table 5: Comparison of estimation via method-of-moments (MOM) and the N-mixture model (MLE) for the negative-binomial case with  $\lambda = 2, 5, 10$ ,  $p = 0.25$ ,  $\alpha = 5$ , and  $R = 20$  for 1000 simulations. RMSE is the root mean-squared error for  $\lambda$ . The upper bound  $K$  for the MLE was automatically selected such that the tail proportion was  $10^{-10}$ . EPD is the proportion of simulations discarded when either covariance diagnostic was negative or either estimate of  $\hat{\lambda} > 100$ . EPN is the proportion of simulations when both diagnostics were negative.

| $T$ | Method | Mean | Median | RMSE | EPD   | EPN   |
|-----|--------|------|--------|------|-------|-------|
| 2   | MLE    | 2.38 | 1.6    | 2.88 | 0.301 | 0.151 |
|     | MOM    | 1.79 | 1.32   | 1.57 |       |       |
| 3   | MLE    | 2.62 | 1.88   | 3.1  | 0.195 | 0.052 |
|     | MOM    | 2.33 | 1.67   | 2.36 |       |       |
| 4   | MLE    | 2.91 | 1.95   | 4.74 | 0.098 | 0.011 |
|     | MOM    | 2.9  | 1.91   | 4.05 |       |       |
| 5   | MLE    | 2.5  | 1.98   | 2.49 | 0.052 | 0.003 |
|     | MOM    | 2.85 | 1.86   | 4.28 |       |       |

| $T$ | Method | Mean | Median | RMSE | EPD   | EPN   |
|-----|--------|------|--------|------|-------|-------|
| 2   | MLE    | 6.25 | 3.89   | 7.86 | 0.243 | 0.065 |
|     | MOM    | 5.6  | 3.6    | 7.07 |       |       |
| 3   | MLE    | 6.51 | 4.47   | 7.77 | 0.129 | 0.01  |
|     | MOM    | 6.41 | 4.13   | 8.62 |       |       |
| 4   | MLE    | 6.6  | 4.86   | 6.48 | 0.094 | 0.001 |
|     | MOM    | 6.93 | 4.67   | 8.21 |       |       |
| 5   | MLE    | 6.58 | 4.88   | 7.44 | 0.07  | 0.001 |
|     | MOM    | 6.92 | 4.64   | 8.15 |       |       |

| $T$ | Method | Mean  | Median | RMSE  | EPD   | EPN  |
|-----|--------|-------|--------|-------|-------|------|
| 2   | MLE    | 11.11 | 7.55   | 10.41 | 0.235 | 0.02 |
|     | MOM    | 10.45 | 7      | 10.94 |       |      |
| 3   | MLE    | 12.08 | 8.8    | 11.23 | 0.153 | 0    |
|     | MOM    | 12.52 | 8.57   | 12.35 |       |      |
| 4   | MLE    | 12.34 | 9.45   | 10.68 | 0.091 | 0    |
|     | MOM    | 12.29 | 9.01   | 10.74 |       |      |
| 5   | MLE    | 11.84 | 9.51   | 8.03  | 0.053 | 0    |
|     | MOM    | 12.44 | 9.33   | 10.08 |       |      |

Web Table 6: Comparison of estimation via method-of-moments (MOM) and the N-mixture model (MLE) for the negative-binomial case with  $\lambda = 2, 5, 10$ ,  $p = 0.1$ ,  $\alpha = 5$ , and  $R = 20$  for 1000 simulations. RMSE is the root mean-squared error for  $\lambda$ . The upper bound  $K$  for the MLE was automatically selected such that the tail proportion was  $10^{-10}$ . EPD is the proportion of simulations discarded when either covariance diagnostic was negative or either estimate of  $\hat{\lambda} > 100$ . EPN is the proportion of simulations when both diagnostics were negative.

|                  | $T$ | Method | Mean | Median | RMSE  | EPD   | EPN   |
|------------------|-----|--------|------|--------|-------|-------|-------|
| a) $\lambda = 2$ | 2   | MLE    | 1    | 0.65   | 1.44  | 0.605 | 0.497 |
|                  |     | MOM    | 0.7  | 0.6    | 1.4   |       |       |
|                  | 3   | MLE    | 1.56 | 1.04   | 2.15  | 0.482 | 0.291 |
|                  |     | MOM    | 1.18 | 0.82   | 1.28  |       |       |
|                  | 4   | MLE    | 2.25 | 1.31   | 3.45  | 0.454 | 0.187 |
|                  |     | MOM    | 1.6  | 1.06   | 1.62  |       |       |
| 5                | MLE | 2.75   | 1.56 | 5.47   | 0.393 | 0.139 |       |
|                  | MOM | 1.81   | 1.17 | 2.05   |       |       |       |

|                  | $T$ | Method | Mean | Median | RMSE  | EPD   | EPN   |
|------------------|-----|--------|------|--------|-------|-------|-------|
| b) $\lambda = 5$ | 2   | MLE    | 3.39 | 1.86   | 6.29  | 0.517 | 0.301 |
|                  |     | MOM    | 2.19 | 1.56   | 3.32  |       |       |
|                  | 3   | MLE    | 4.73 | 2.61   | 7.9   | 0.449 | 0.174 |
|                  |     | MOM    | 3.45 | 2.18   | 4.17  |       |       |
|                  | 4   | MLE    | 5.4  | 3.34   | 8.1   | 0.384 | 0.092 |
|                  |     | MOM    | 4.36 | 2.73   | 5.7   |       |       |
| 5                | MLE | 5.82   | 3.64 | 7.9    | 0.342 | 0.063 |       |
|                  | MOM | 5.66   | 2.99 | 10.01  |       |       |       |

|                   | $T$ | Method | Mean | Median | RMSE  | EPD   | EPN   |
|-------------------|-----|--------|------|--------|-------|-------|-------|
| c) $\lambda = 10$ | 2   | MLE    | 7.09 | 4.13   | 9.52  | 0.466 | 0.171 |
|                   |     | MOM    | 5.51 | 3.61   | 6.99  |       |       |
|                   | 3   | MLE    | 8.42 | 5.19   | 10    | 0.393 | 0.075 |
|                   |     | MOM    | 7.34 | 4.55   | 9.28  |       |       |
|                   | 4   | MLE    | 9.72 | 5.96   | 10.9  | 0.36  | 0.045 |
|                   |     | MOM    | 9.13 | 5.55   | 10.7  |       |       |
| 5                 | MLE | 9.76   | 6.65 | 10.56  | 0.343 | 0.015 |       |
|                   | MOM | 9.94   | 5.85 | 11.41  |       |       |       |

## 70 Web Appendix 3

### 71 Supplementary tables and figures

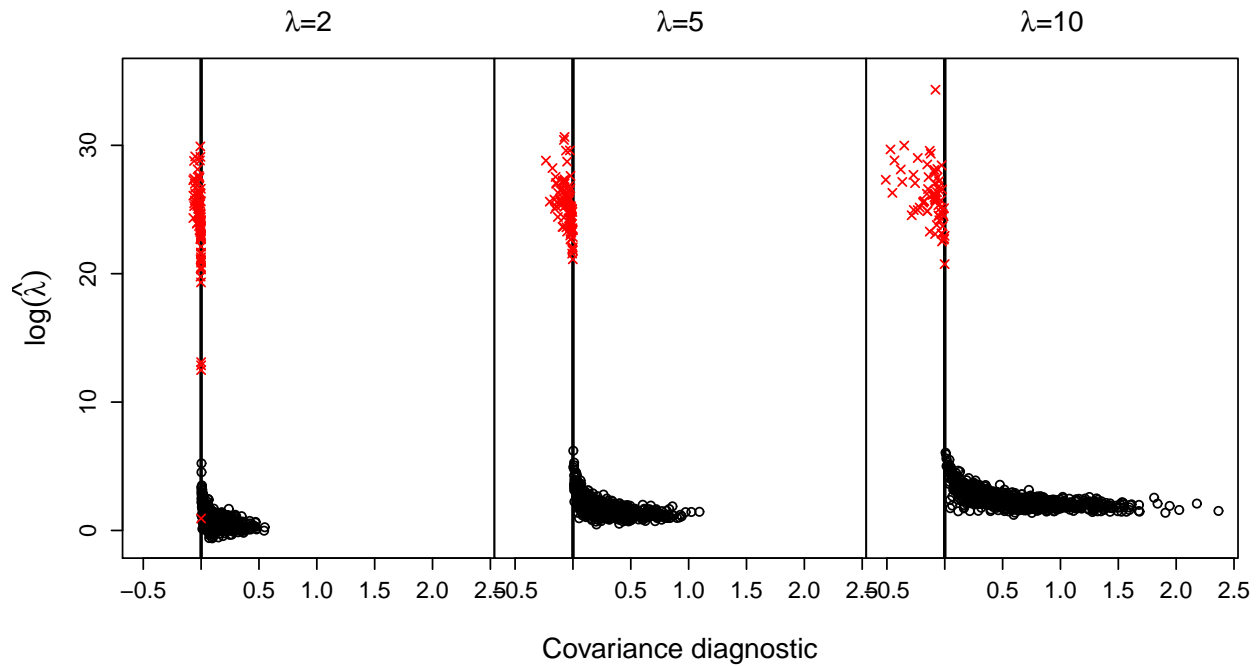

Web Figure 4:  $\text{Log}(\hat{\lambda})$  from the multivariate Poisson model with  $T = 3$  plotted against the covariance diagnostic,  $\text{cov}^*(n_1, n_2, n_3) \leq 0$  from (6), based upon 1000 simulated datasets for  $R = 20$ ,  $\lambda = 2, 5, 10$  and  $p = 0.25$ . Values at which the covariance diagnostic is negative are shown by crosses.

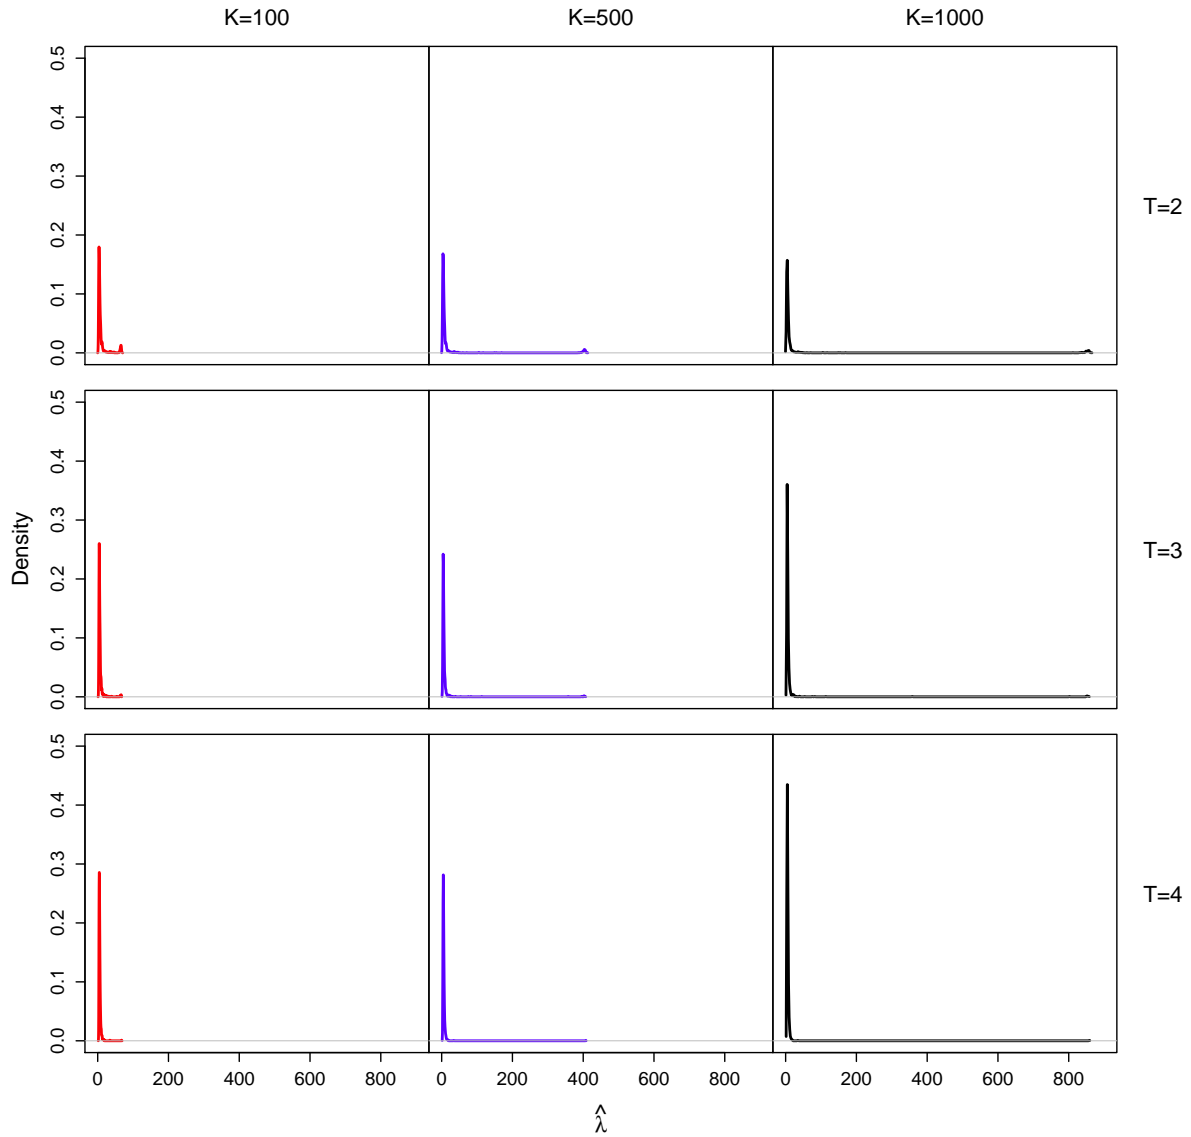

Web Figure 5: Kernel density estimates of  $\hat{\lambda}$  from the Poisson N-mixture model for  $R = 50$  sites,  $\lambda = 5$  and  $p = 0.25$  based upon 1000 simulated datasets for  $T = 2, 3, 4$  and  $K = 100$  (red), 500 (blue) and 1000 (black).

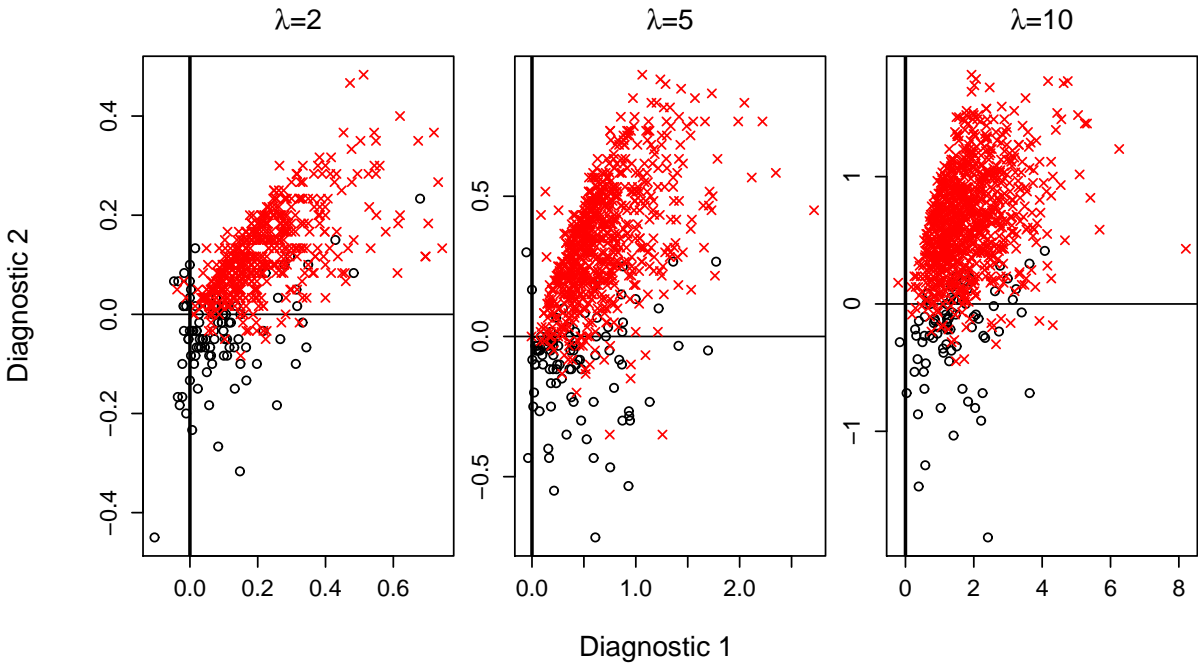

Web Figure 6: Diagnostic 1 (13) versus diagnostic 2 (14) from the multivariate negative binomial model when  $T = 3$ , based upon 1000 simulated datasets for  $R = 20$ ,  $\lambda = 2, 5, 10$ ,  $\alpha = 5$  and  $p = 0.25$ . Values where  $\hat{\lambda} > 500$  and  $\hat{\lambda} \leq 500$  are shown by circles and crosses, respectively.



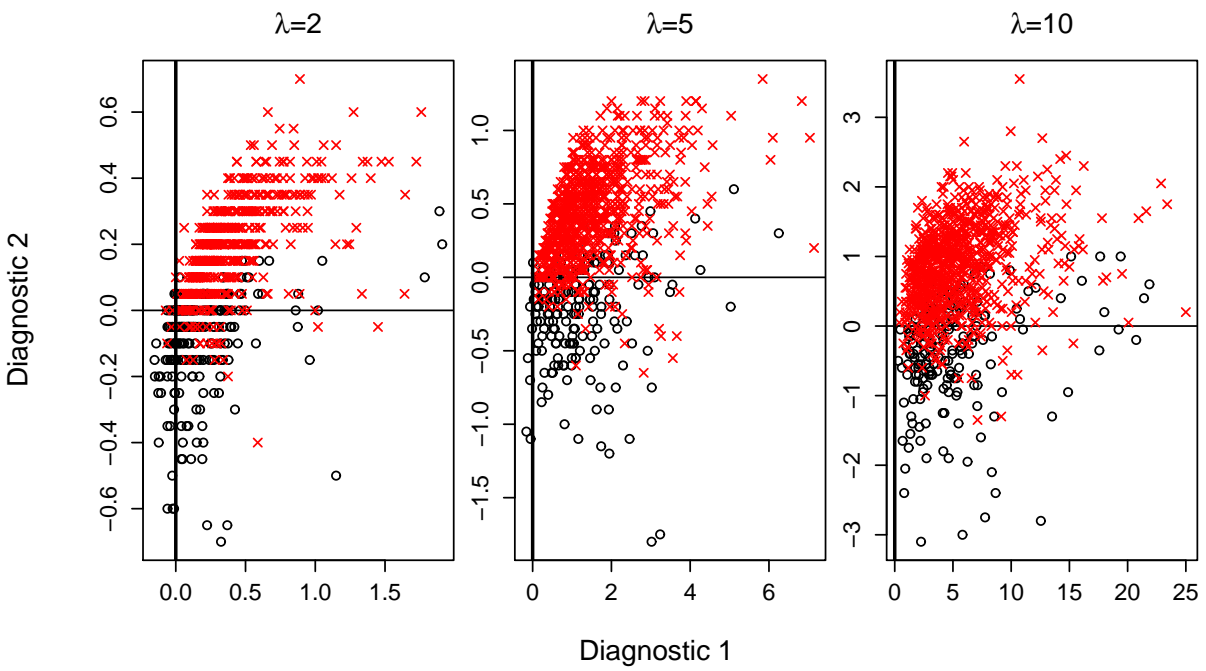

Web Figure 7: Diagnostic 1 (13) versus diagnostic 2 (14) from the bivariate negative binomial model, based upon 1000 simulated datasets for  $R = 20$ ,  $\lambda = 2, 5, 10$ ,  $\alpha = 1.25$  and  $p = 0.25$ . Values where  $\hat{\lambda} > 500$  and  $\hat{\lambda} \leq 500$  are shown by circles and crosses, respectively.

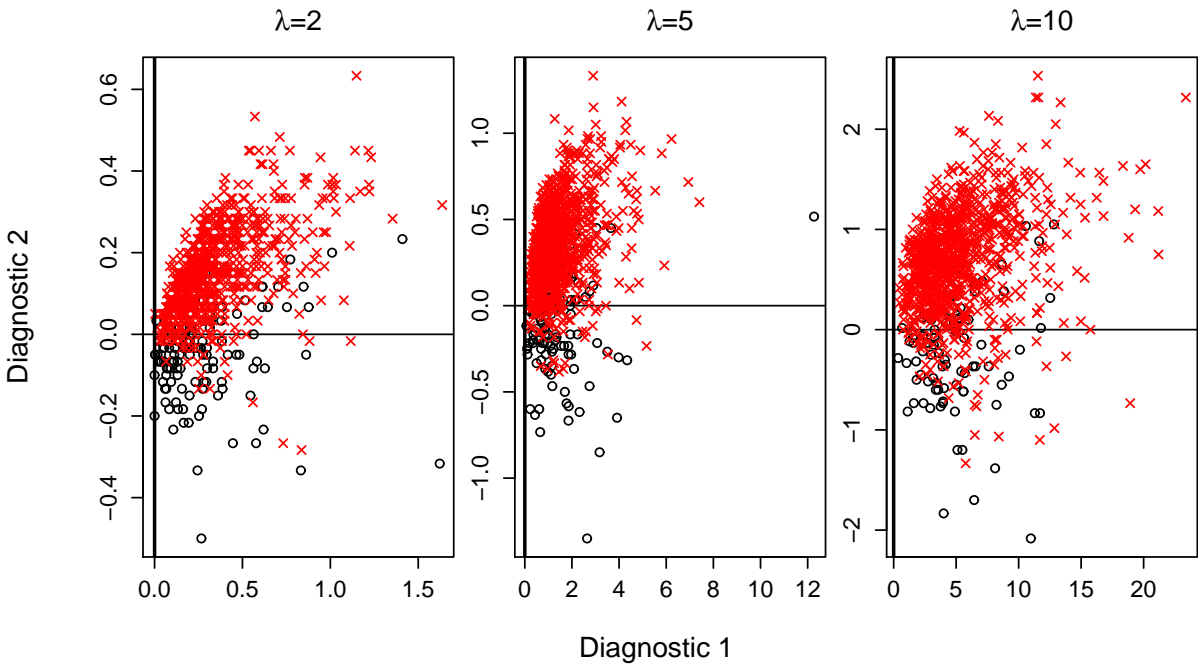

Web Figure 8: Diagnostic 1 (13) versus diagnostic 2 (14) from the multivariate negative binomial model when  $T = 3$ , based upon 1000 simulated datasets for  $R = 20$ ,  $\lambda = 2, 5, 10$ ,  $\alpha = 1.25$  and  $p = 0.25$ . Values where  $\hat{\lambda} > 500$  and  $\hat{\lambda} \leq 500$  are shown by circles and crosses, respectively.
